# Supplementary material for: Quantitative Impact Analysis of Climate Change on Residents’ Health Conditions with Improving Eco-Efficiency in China: A Machine Learning Perspective
Source: MDPI journal article supplement (doi:10.3390/ijerph182312842), 2021-12-06
Supplement: s1 [file s1]

**Table S1.** Sample learning and prediction accuracy comparison (temperature forecasting VTH).

| <b>Region</b>         | <b>MPE</b> | <b>MSE</b> | <b>SDE</b> |
|-----------------------|------------|------------|------------|
| <b>China</b>          | 0.000296   | 0.005300   | 0.072800   |
| <b>Beijing</b>        | 0.001737   | 0.000931   | 0.030512   |
| <b>Tianjin</b>        | 0.001076   | 0.000051   | 0.007160   |
| <b>Hebei</b>          | 0.002358   | 0.000541   | 0.023249   |
| <b>Shanxi</b>         | 0.000000   | 0.000000   | 0.000000   |
| <b>Inner Mongolia</b> | 0.001108   | 0.000032   | 0.005623   |
| <b>Liaoning</b>       | 0.000285   | 0.000034   | 0.005794   |
| <b>Jilin</b>          | 0.002201   | 0.000115   | 0.010707   |
| <b>Heilongjiang</b>   | 0.001359   | 0.000125   | 0.011194   |
| <b>Shanghai</b>       | 0.000032   | 0.000028   | 0.005294   |
| <b>Jiangsu</b>        | 0.000000   | 0.000000   | 0.000000   |
| <b>Zhejiang</b>       | 0.000002   | 0.000000   | 0.000186   |
| <b>Anhui</b>          | 0.000325   | 0.000008   | 0.002863   |
| <b>Fujian</b>         | 0.000429   | 0.000065   | 0.008038   |
| <b>Jiangxi</b>        | 0.000993   | 0.000099   | 0.009925   |
| <b>Shandong</b>       | 0.000094   | 0.000052   | 0.007185   |
| <b>Henan</b>          | 0.000160   | 0.000061   | 0.007812   |
| <b>Hubei</b>          | 0.000694   | 0.000102   | 0.010094   |
| <b>Hunan</b>          | 0.001348   | 0.000102   | 0.010115   |
| <b>Guangdong</b>      | 0.000450   | 0.001427   | 0.037775   |
| <b>Guangxi</b>        | 0.000156   | 0.000017   | 0.004063   |
| <b>Hainan</b>         | 0.000005   | 0.000000   | 0.000076   |
| <b>Chongqing</b>      | 0.000000   | 0.000000   | 0.000001   |
| <b>Sichuan</b>        | 0.000236   | 0.000076   | 0.008695   |
| <b>Guizhou</b>        | 0.000000   | 0.000000   | 0.000001   |
| <b>Yunnan</b>         | 0.000050   | 0.000006   | 0.002492   |
| <b>Shaanxi</b>        | 0.000001   | 0.000000   | 0.000019   |
| <b>Gansu</b>          | 0.002249   | 0.000068   | 0.008275   |
| <b>Qinghai</b>        | 0.000019   | 0.000000   | 0.000153   |
| <b>Ningxia</b>        | 0.001355   | 0.000008   | 0.002798   |
| <b>Xinjiang</b>       | 0.000086   | 0.000003   | 0.001823   |

**Table S2.** Sample learning and prediction accuracy comparison (temperature forecasting OWT (100 million)).

| Region         | MPE      | MSE      | SDE      |
|----------------|----------|----------|----------|
| China          | 0.000252 | 0.004488 | 0.066990 |
| Beijing        | 0.000871 | 0.000700 | 0.026458 |
| Tianjin        | 0.001308 | 0.000058 | 0.007612 |
| Hebei          | 0.002730 | 0.000529 | 0.023005 |
| Shanxi         | 0.000257 | 0.000011 | 0.003264 |
| Inner Mongolia | 0.001178 | 0.000029 | 0.005367 |
| Liaoning       | 0.000273 | 0.000029 | 0.005359 |
| Jilin          | 0.001976 | 0.000091 | 0.009552 |
| Heilongjiang   | 0.001286 | 0.000104 | 0.010191 |
| Shanghai       | 0.000030 | 0.000025 | 0.005010 |
| Jiangsu        | 0.000000 | 0.000000 | 0.000001 |
| Zhejiang       | 0.000000 | 0.000000 | 0.000011 |
| Anhui          | 0.000049 | 0.000001 | 0.001220 |
| Fujian         | 0.000583 | 0.000070 | 0.008377 |
| Jiangxi        | 0.000844 | 0.000084 | 0.009157 |
| Shandong       | 0.000061 | 0.000029 | 0.005419 |
| Henan          | 0.000168 | 0.000056 | 0.007499 |
| Hubei          | 0.000672 | 0.000079 | 0.008904 |
| Hunan          | 0.001355 | 0.000100 | 0.009996 |
| Guangdong      | 0.000488 | 0.001527 | 0.039079 |
| Guangxi        | 0.000115 | 0.000012 | 0.003405 |
| Hainan         | 0.000016 | 0.000000 | 0.000349 |
| Chongqing      | 0.000000 | 0.000000 | 0.000001 |
| Sichuan        | 0.000272 | 0.000079 | 0.008861 |
| Guizhou        | 0.000000 | 0.000000 | 0.000000 |
| Yunnan         | 0.000055 | 0.000008 | 0.002748 |
| Shaanxi        | 0.000020 | 0.000000 | 0.000447 |
| Gansu          | 0.002206 | 0.000066 | 0.008107 |
| Qinghai        | 0.001668 | 0.000004 | 0.001889 |
| Ningxia        | 0.001226 | 0.000006 | 0.002505 |
| Xinjiang       | 0.000079 | 0.000003 | 0.001594 |

**Table S3.** Sample learning and prediction accuracy comparison (temperature forecasting NOH (10,000 people)).

| Region         | MPE      | MSE         | SDE       |
|----------------|----------|-------------|-----------|
| China          | 0.000044 | 1970.296095 | 44.388017 |
| Beijing        | 0.000957 | 19.130206   | 4.373809  |
| Tianjin        | 0.000119 | 1.566336    | 1.251534  |
| Hebei          | 0.002883 | 254.402122  | 15.949988 |
| Shanxi         | 0.000260 | 26.438153   | 5.141804  |
| Inner Mongolia | 0.000428 | 8.783828    | 2.963752  |
| Liaoning       | 0.000379 | 16.213131   | 4.026553  |
| Jilin          | 0.001271 | 18.086354   | 4.252805  |
| Heilongjiang   | 0.002088 | 67.237358   | 8.199839  |
| Shanghai       | 0.000006 | 0.047217    | 0.217294  |
| Jiangsu        | 0.000618 | 22.453488   | 4.738511  |
| Zhejiang       | 0.000011 | 0.024293    | 0.155861  |

|           |           |            |           |
|-----------|-----------|------------|-----------|
| Anhui     | 0.000267  | 22.754719  | 4.770191  |
| Fujian    | 0.001282  | 35.982166  | 5.998514  |
| Jiangxi   | 0.000038  | 0.055206   | 0.234960  |
| Shandong  | 0.000183  | 275.718338 | 16.604769 |
| Henan     | 0.000969  | 116.294052 | 10.783972 |
| Hubei     | 0.000223  | 30.227417  | 5.497947  |
| Hunan     | 0.001860  | 86.571669  | 9.304390  |
| Guangdong | 0.000386  | 110.342589 | 10.504408 |
| Guangxi   | 0.000001  | 0.002497   | 0.049968  |
| Hainan    | 0.000211  | 0.437663   | 0.661561  |
| Chongqing | 0.000341  | 8.059000   | 2.838838  |
| Sichuan   | 0.000444  | 135.583188 | 11.644019 |
| Guizhou   | 0.000000  | 0.000000   | 0.000018  |
| Yunnan    | -0.000068 | 46.753858  | 6.837679  |
| Shaanxi   | 0.000101  | 2.743315   | 1.656296  |
| Gansu     | 0.002920  | 27.769131  | 5.269642  |
| Qinghai   | 0.000064  | 0.000424   | 0.020597  |
| Ningxia   | 0.001123  | 2.183168   | 1.477555  |
| Xinjiang  | 0.000956  | 26.025765  | 5.101545  |

**Table S4.** Sample learning and prediction accuracy comparison (humidity forecasting VTH).

| Region         | MPE      | MSE      | SDE      |
|----------------|----------|----------|----------|
| China          | 0.000259 | 0.004053 | 0.063664 |
| Beijing        | 0.001203 | 0.000275 | 0.016584 |
| Tianjin        | 0.000333 | 0.000020 | 0.004513 |
| Hebei          | 0.000389 | 0.000059 | 0.007697 |
| Shanxi         | 0.000125 | 0.000004 | 0.002043 |
| Inner Mongolia | 0.000333 | 0.000006 | 0.002459 |
| Liaoning       | 0.000404 | 0.000078 | 0.008833 |
| Jilin          | 0.001250 | 0.000069 | 0.008297 |
| Heilongjiang   | 0.001241 | 0.000123 | 0.011094 |
| Shanghai       | 0.000035 | 0.000015 | 0.003911 |
| Jiangsu        | 0.000000 | 0.000000 | 0.000013 |
| Zhejiang       | 0.000083 | 0.000066 | 0.008116 |
| Anhui          | 0.000065 | 0.000002 | 0.001411 |
| Fujian         | 0.000354 | 0.000041 | 0.006384 |
| Jiangxi        | 0.000590 | 0.000017 | 0.004141 |
| Shandong       | 0.000565 | 0.000645 | 0.025397 |
| Henan          | 0.000172 | 0.000041 | 0.006368 |
| Hubei          | 0.000580 | 0.000085 | 0.009219 |
| Hunan          | 0.000000 | 0.000000 | 0.000000 |
| Guangdong      | 0.000127 | 0.000335 | 0.018299 |
| Guangxi        | 0.000838 | 0.000117 | 0.010802 |
| Hainan         | 0.000314 | 0.000001 | 0.001121 |
| Chongqing      | 0.000973 | 0.000025 | 0.004960 |
| Sichuan        | 0.000521 | 0.000173 | 0.013141 |
| Guizhou        | 0.000032 | 0.000000 | 0.000472 |
| Yunnan         | 0.000000 | 0.000000 | 0.000314 |
| Shaanxi        | 0.001042 | 0.000080 | 0.008928 |

|          |          |          |          |
|----------|----------|----------|----------|
| Gansu    | 0.002010 | 0.000081 | 0.009019 |
| Qinghai  | 0.000019 | 0.000000 | 0.000083 |
| Ningxia  | 0.001141 | 0.000007 | 0.002628 |
| Xinjiang | 0.000353 | 0.000018 | 0.004284 |

**Table S5.** Sample learning and prediction accuracy comparison (humidity forecasting OWT (100 million)).

| Region         | MPE      | MSE      | SDE      |
|----------------|----------|----------|----------|
| China          | 0.003374 | 0.058088 | 0.003374 |
| Beijing        | 0.000257 | 0.016031 | 0.000257 |
| Tianjin        | 0.000001 | 0.001164 | 0.000001 |
| Hebei          | 0.000019 | 0.004318 | 0.000019 |
| Shanxi         | 0.000008 | 0.002830 | 0.000008 |
| Inner Mongolia | 0.000002 | 0.001506 | 0.000002 |
| Liaoning       | 0.000077 | 0.008758 | 0.000077 |
| Jilin          | 0.000069 | 0.008280 | 0.000069 |
| Heilongjiang   | 0.000098 | 0.009903 | 0.000098 |
| Shanghai       | 0.000014 | 0.003755 | 0.000014 |
| Jiangsu        | 0.000000 | 0.000022 | 0.000000 |
| Zhejiang       | 0.000076 | 0.008734 | 0.000076 |
| Anhui          | 0.000000 | 0.000136 | 0.000000 |
| Fujian         | 0.000037 | 0.006053 | 0.000037 |
| Jiangxi        | 0.000014 | 0.003799 | 0.000014 |
| Shandong       | 0.000565 | 0.023771 | 0.000565 |
| Henan          | 0.000039 | 0.006274 | 0.000039 |
| Hubei          | 0.000067 | 0.008160 | 0.000067 |
| Hunan          | 0.000000 | 0.000000 | 0.000000 |
| Guangdong      | 0.001636 | 0.040452 | 0.001636 |
| Guangxi        | 0.000044 | 0.006657 | 0.000044 |
| Hainan         | 0.000001 | 0.000777 | 0.000001 |
| Chongqing      | 0.000053 | 0.007266 | 0.000053 |
| Sichuan        | 0.000141 | 0.011886 | 0.000141 |
| Guizhou        | 0.000000 | 0.000000 | 0.000000 |
| Yunnan         | 0.000000 | 0.000647 | 0.000000 |
| Shaanxi        | 0.000078 | 0.008829 | 0.000078 |
| Gansu          | 0.000076 | 0.008704 | 0.000076 |
| Qinghai        | 0.000005 | 0.002133 | 0.000005 |
| Ningxia        | 0.000005 | 0.002324 | 0.000005 |
| Xinjiang       | 0.000033 | 0.005712 | 0.000033 |

**Table S6.** Sample learning and prediction accuracy comparison (humidity forecasting NOH (10,000 people)).

| Region         | MPE       | MSE         | SDE       |
|----------------|-----------|-------------|-----------|
| China          | 0.000135  | 1630.011984 | 40.373407 |
| Beijing        | 0.001182  | 22.630093   | 4.757110  |
| Tianjin        | 0.000430  | 2.786358    | 1.669239  |
| Hebei          | 0.004929  | 421.082367  | 20.520292 |
| Shanxi         | 0.000176  | 29.496203   | 5.431041  |
| Inner Mongolia | 0.000150  | 7.473908    | 2.733845  |
| Liaoning       | 0.000294  | 21.336610   | 4.619157  |
| Jilin          | 0.000965  | 13.713701   | 3.703201  |
| Heilongjiang   | 0.001794  | 78.336723   | 8.850804  |
| Shanghai       | 0.000049  | 1.686020    | 1.298468  |
| Jiangsu        | 0.000989  | 152.752013  | 12.359289 |
| Zhejiang       | 0.000019  | 0.486412    | 0.697432  |
| Anhui          | 0.000000  | 0.000001    | 0.000801  |
| Fujian         | 0.001600  | 26.933498   | 5.189749  |
| Jiangxi        | 0.000863  | 73.052363   | 8.547067  |
| Shandong       | 0.000567  | 354.972466  | 18.840713 |
| Henan          | 0.000835  | 80.442702   | 8.968986  |
| Hubei          | 0.000735  | 39.259898   | 6.265772  |
| Hunan          | 0.001931  | 85.982476   | 9.272674  |
| Guangdong      | 0.001496  | 137.847088  | 11.740830 |
| Guangxi        | 0.000005  | 0.361892    | 0.601575  |
| Hainan         | 0.000066  | 0.052808    | 0.229800  |
| Chongqing      | 0.000469  | 1.807055    | 1.344268  |
| Sichuan        | 0.000405  | 126.769778  | 11.259209 |
| Guizhou        | 0.000453  | 7.685597    | 2.772291  |
| Yunnan         | -0.000196 | 52.116854   | 7.219200  |
| Shaanxi        | 0.000000  | 0.000000    | 0.000498  |
| Gansu          | 0.002448  | 30.362087   | 5.510180  |
| Qinghai        | 0.012486  | 6.584755    | 2.566078  |
| Ningxia        | 0.001381  | 1.278189    | 1.130570  |
| Xinjiang       | 0.001377  | 32.254166   | 5.679275  |

**Table S7.** Sample learning and prediction accuracy comparison (precipitation forecasting VTH).

| Region         | MPE      | MSE      | SDE      |
|----------------|----------|----------|----------|
| China          | 0.000296 | 0.004604 | 0.067855 |
| Beijing        | 0.002875 | 0.000797 | 0.028236 |
| Tianjin        | 0.000378 | 0.000028 | 0.005317 |
| Hebei          | 0.001867 | 0.000328 | 0.018121 |
| Shanxi         | 0.001259 | 0.000075 | 0.008634 |
| Inner Mongolia | 0.000247 | 0.000003 | 0.001646 |
| Liaoning       | 0.000258 | 0.000046 | 0.006770 |
| Jilin          | 0.001905 | 0.000122 | 0.011028 |
| Heilongjiang   | 0.001349 | 0.000126 | 0.011217 |
| Shanghai       | 0.000063 | 0.000036 | 0.005987 |
| Jiangsu        | 0.000016 | 0.000010 | 0.003100 |
| Zhejiang       | 0.000175 | 0.000114 | 0.010688 |

|           |          |          |          |
|-----------|----------|----------|----------|
| Anhui     | 0.000888 | 0.000049 | 0.006969 |
| Fujian    | 0.000420 | 0.000073 | 0.008520 |
| Jiangxi   | 0.000598 | 0.000021 | 0.004585 |
| Shandong  | 0.000434 | 0.000432 | 0.020785 |
| Henan     | 0.000410 | 0.000082 | 0.009052 |
| Hubei     | 0.001194 | 0.000172 | 0.013099 |
| Hunan     | 0.000083 | 0.000006 | 0.002456 |
| Guangdong | 0.000305 | 0.001057 | 0.032512 |
| Guangxi   | 0.000570 | 0.000087 | 0.009348 |
| Hainan    | 0.000000 | 0.000000 | 0.000001 |
| Chongqing | 0.000000 | 0.000000 | 0.000014 |
| Sichuan   | 0.000237 | 0.000061 | 0.007808 |
| Guizhou   | 0.001172 | 0.000040 | 0.006293 |
| Yunnan    | 0.000062 | 0.000010 | 0.003205 |
| Shaanxi   | 0.001060 | 0.000080 | 0.008949 |
| Gansu     | 0.000001 | 0.000000 | 0.000008 |
| Qinghai   | 0.000019 | 0.000000 | 0.000242 |
| Ningxia   | 0.001506 | 0.000008 | 0.002902 |
| Xinjiang  | 0.000122 | 0.000010 | 0.003126 |

**Table S8.** Sample learning and prediction accuracy comparison (precipitation forecasting OWT (100 million)).

| Region         | MPE      | MSE      | SDE      |
|----------------|----------|----------|----------|
| China          | 0.000252 | 0.003812 | 0.061742 |
| Beijing        | 0.002094 | 0.000603 | 0.024547 |
| Tianjin        | 0.000429 | 0.000031 | 0.005571 |
| Hebei          | 0.001320 | 0.000146 | 0.012099 |
| Shanxi         | 0.000835 | 0.000043 | 0.006571 |
| Inner Mongolia | 0.000015 | 0.000000 | 0.000159 |
| Liaoning       | 0.000262 | 0.000077 | 0.008776 |
| Jilin          | 0.001682 | 0.000102 | 0.010076 |
| Heilongjiang   | 0.001343 | 0.000115 | 0.010725 |
| Shanghai       | 0.000056 | 0.000033 | 0.005729 |
| Jiangsu        | 0.000004 | 0.000003 | 0.001628 |
| Zhejiang       | 0.000138 | 0.000080 | 0.008918 |
| Anhui          | 0.000101 | 0.000006 | 0.002364 |
| Fujian         | 0.000507 | 0.000061 | 0.007795 |
| Jiangxi        | 0.000528 | 0.000017 | 0.004169 |
| Shandong       | 0.000312 | 0.000260 | 0.016126 |
| Henan          | 0.000316 | 0.000062 | 0.007893 |
| Hubei          | 0.001011 | 0.000124 | 0.011134 |
| Hunan          | 0.000113 | 0.000008 | 0.002827 |
| Guangdong      | 0.000313 | 0.001010 | 0.031788 |
| Guangxi        | 0.000306 | 0.000041 | 0.006410 |
| Hainan         | 0.000069 | 0.000000 | 0.000528 |
| Chongqing      | 0.000000 | 0.000000 | 0.000016 |
| Sichuan        | 0.000251 | 0.000066 | 0.008122 |
| Guizhou        | 0.000156 | 0.000002 | 0.001230 |
| Yunnan         | 0.000040 | 0.000007 | 0.002589 |
| Shaanxi        | 0.001244 | 0.000075 | 0.008649 |

|          |          |          |          |
|----------|----------|----------|----------|
| Gansu    | 0.000000 | 0.000000 | 0.000000 |
| Qinghai  | 0.000002 | 0.000000 | 0.000008 |
| Ningxia  | 0.001396 | 0.000007 | 0.002643 |
| Xinjiang | 0.000149 | 0.000008 | 0.002911 |

**Table S9.** Sample learning and prediction accuracy comparison (precipitation forecasting NOH (10,000 people)).

| Region         | MPE       | MSE         | SDE       |
|----------------|-----------|-------------|-----------|
| China          | 0.000121  | 1584.344982 | 39.803831 |
| Beijing        | 0.001689  | 19.076299   | 4.367642  |
| Tianjin        | 0.000245  | 1.713238    | 1.308907  |
| Hebei          | 0.004611  | 370.160030  | 19.239543 |
| Shanxi         | 0.000355  | 23.198834   | 4.816517  |
| Inner Mongolia | 0.000227  | 4.596486    | 2.143942  |
| Liaoning       | 0.000396  | 34.112284   | 5.840572  |
| Jilin          | 0.001430  | 21.209976   | 4.605429  |
| Heilongjiang   | 0.002159  | 81.322054   | 9.017874  |
| Shanghai       | 0.000046  | 2.030433    | 1.424933  |
| Jiangsu        | 0.000426  | 7.774070    | 2.788202  |
| Zhejiang       | 0.000000  | 0.000000    | 0.000515  |
| Anhui          | 0.000194  | 9.486102    | 3.079952  |
| Fujian         | 0.001784  | 69.433223   | 8.332660  |
| Jiangxi        | 0.001406  | 11.782794   | 3.432607  |
| Shandong       | 0.000274  | 316.463392  | 17.789418 |
| Henan          | 0.000963  | 111.124734  | 10.541572 |
| Hubei          | 0.000932  | 43.724231   | 6.612430  |
| Hunan          | 0.000548  | 18.438753   | 4.294037  |
| Guangdong      | 0.000449  | 120.761869  | 10.989171 |
| Guangxi        | -0.000071 | 20.839091   | 4.564985  |
| Hainan         | 0.000054  | 0.046119    | 0.214754  |
| Chongqing      | -0.000257 | 8.732400    | 2.955063  |
| Sichuan        | 0.000000  | 0.000000    | 0.000233  |
| Guizhou        | 0.000267  | 2.703736    | 1.644304  |
| Yunnan         | 0.000704  | 60.457944   | 7.775471  |
| Shaanxi        | 0.000056  | 2.661778    | 1.631496  |
| Gansu          | 0.000000  | 0.000000    | 0.000130  |
| Qinghai        | 0.014937  | 5.599743    | 2.366378  |
| Ningxia        | 0.002009  | 2.335538    | 1.528247  |
| Xinjiang       | 0.001669  | 39.287940   | 6.268009  |

**Table S10.** Sample learning and prediction accuracy comparison (sunshine forecasting VTH).

| Region         | MPE      | MSE      | SDE      |
|----------------|----------|----------|----------|
| China          | 0.000165 | 0.001513 | 0.038903 |
| Beijing        | 0.000882 | 0.000330 | 0.018173 |
| Tianjin        | 0.000074 | 0.000003 | 0.001620 |
| Hebei          | 0.001361 | 0.000250 | 0.015825 |
| Shanxi         | 0.000000 | 0.000000 | 0.000000 |
| Inner Mongolia | 0.000327 | 0.000007 | 0.002645 |
| Liaoning       | 0.000374 | 0.000053 | 0.007292 |

|              |          |          |          |
|--------------|----------|----------|----------|
| Jilin        | 0.000000 | 0.000000 | 0.000000 |
| Heilongjiang | 0.001443 | 0.000120 | 0.010948 |
| Shanghai     | 0.000068 | 0.000054 | 0.007322 |
| Jiangsu      | 0.000083 | 0.000093 | 0.009654 |
| Zhejiang     | 0.000208 | 0.000087 | 0.009320 |
| Anhui        | 0.000127 | 0.000009 | 0.003052 |
| Fujian       | 0.000553 | 0.000049 | 0.007027 |
| Jiangxi      | 0.000325 | 0.000012 | 0.003467 |
| Shandong     | 0.000040 | 0.000006 | 0.002366 |
| Henan        | 0.000154 | 0.000049 | 0.007002 |
| Hubei        | 0.000408 | 0.000042 | 0.006493 |
| Hunan        | 0.001044 | 0.000068 | 0.008268 |
| Guangdong    | 0.000454 | 0.001836 | 0.042854 |
| Guangxi      | 0.000438 | 0.000063 | 0.007935 |
| Hainan       | 0.000000 | 0.000000 | 0.000003 |
| Chongqing    | 0.000000 | 0.000000 | 0.000006 |
| Sichuan      | 0.000247 | 0.000109 | 0.010424 |
| Guizhou      | 0.002262 | 0.000067 | 0.008161 |
| Yunnan       | 0.000029 | 0.000003 | 0.001842 |
| Shaanxi      | 0.000000 | 0.000000 | 0.000000 |
| Gansu        | 0.001400 | 0.000045 | 0.006739 |
| Qinghai      | 0.000091 | 0.000000 | 0.000626 |
| Ningxia      | 0.001394 | 0.000007 | 0.002728 |
| Xinjiang     | 0.000349 | 0.000022 | 0.004742 |

Table S11. Sample learning and prediction accuracy comparison (sunshine forecasting OWT (100 million)).

| Region         | MPE      | MSE      | SDE      |
|----------------|----------|----------|----------|
| China          | 0.000146 | 0.001499 | 0.038719 |
| Beijing        | 0.000593 | 0.000310 | 0.017600 |
| Tianjin        | 0.000193 | 0.000012 | 0.003432 |
| Hebei          | 0.000088 | 0.000004 | 0.001979 |
| Shanxi         | 0.000678 | 0.000042 | 0.006481 |
| Inner Mongolia | 0.000451 | 0.000008 | 0.002835 |
| Liaoning       | 0.000040 | 0.000001 | 0.001182 |
| Jilin          | 0.002646 | 0.000118 | 0.010863 |
| Heilongjiang   | 0.000909 | 0.000061 | 0.007821 |
| Shanghai       | 0.000050 | 0.000053 | 0.007314 |
| Jiangsu        | 0.000050 | 0.000048 | 0.006942 |
| Zhejiang       | 0.000078 | 0.000032 | 0.005692 |
| Anhui          | 0.000157 | 0.000046 | 0.006777 |
| Fujian         | 0.000522 | 0.000038 | 0.006196 |
| Jiangxi        | 0.000419 | 0.000017 | 0.004170 |
| Shandong       | 0.000017 | 0.000001 | 0.001011 |
| Henan          | 0.000151 | 0.000042 | 0.006507 |
| Hubei          | 0.000342 | 0.000027 | 0.005175 |
| Hunan          | 0.001053 | 0.000064 | 0.008024 |
| Guangdong      | 0.000446 | 0.001672 | 0.040890 |
| Guangxi        | 0.000250 | 0.000031 | 0.005544 |
| Hainan         | 0.000171 | 0.000001 | 0.000925 |



|                  |          |          |          |
|------------------|----------|----------|----------|
| <b>Chongqing</b> | 0.000218 | 0.000030 | 0.005504 |
| <b>Sichuan</b>   | 0.000277 | 0.000115 | 0.010725 |
| <b>Guizhou</b>   | 0.000411 | 0.000007 | 0.002733 |
| <b>Yunnan</b>    | 0.000051 | 0.000005 | 0.002182 |
| <b>Shaanxi</b>   | 0.000026 | 0.000000 | 0.000634 |
| <b>Gansu</b>     | 0.001853 | 0.000052 | 0.007244 |
| <b>Qinghai</b>   | 0.002072 | 0.000004 | 0.002106 |
| <b>Ningxia</b>   | 0.001103 | 0.000006 | 0.002353 |
| <b>Xinjiang</b>  | 0.000446 | 0.000025 | 0.004955 |

**Table S12.** Sample learning and prediction accuracy comparison (sunshine forecasting NOH (10,000 people)).

| <b>Region</b>         | <b>MPE</b> | <b>MSE</b> | <b>SDE</b> |
|-----------------------|------------|------------|------------|
| <b>China</b>          | 0.000043   | 270.196617 | 16.437658  |
| <b>Beijing</b>        | 0.001227   | 18.586989  | 4.311263   |
| <b>Tianjin</b>        | 0.000272   | 2.179508   | 1.476316   |
| <b>Hebei</b>          | 0.004527   | 335.369559 | 18.313098  |
| <b>Shanxi</b>         | 0.000141   | 35.946415  | 5.995533   |
| <b>Inner Mongolia</b> | 0.000588   | 11.474070  | 3.387340   |
| <b>Liaoning</b>       | 0.000118   | 13.013918  | 3.607481   |
| <b>Jilin</b>          | 0.001620   | 17.995828  | 4.242149   |
| <b>Heilongjiang</b>   | 0.000877   | 24.101399  | 4.909318   |
| <b>Shanghai</b>       | 0.000054   | 2.678408   | 1.636584   |
| <b>Jiangsu</b>        | 0.000455   | 45.777794  | 6.765929   |
| <b>Zhejiang</b>       | 0.000000   | 0.000000   | 0.000044   |
| <b>Anhui</b>          | -0.000231  | 35.627764  | 5.968900   |
| <b>Fujian</b>         | 0.003298   | 40.040784  | 6.327779   |
| <b>Jiangxi</b>        | 0.000087   | 1.203376   | 1.096985   |
| <b>Shandong</b>       | 0.000533   | 295.974136 | 17.203899  |
| <b>Henan</b>          | 0.000335   | 35.615976  | 5.967912   |
| <b>Hubei</b>          | 0.001495   | 65.521461  | 8.094533   |
| <b>Hunan</b>          | 0.002869   | 101.089104 | 10.054308  |
| <b>Guangdong</b>      | 0.002227   | 224.810225 | 14.993673  |
| <b>Guangxi</b>        | 0.000033   | 11.781165  | 3.432370   |
| <b>Hainan</b>         | 0.000081   | 0.598349   | 0.773530   |
| <b>Chongqing</b>      | 0.000000   | 0.000001   | 0.000784   |
| <b>Sichuan</b>        | 0.000229   | 182.066516 | 13.493203  |
| <b>Guizhou</b>        | 0.000874   | 21.418014  | 4.627960   |
| <b>Yunnan</b>         | 0.000191   | 17.352971  | 4.165690   |
| <b>Shaanxi</b>        | 0.000026   | 2.512223   | 1.584999   |
| <b>Gansu</b>          | 0.002432   | 28.259861  | 5.316001   |
| <b>Qinghai</b>        | 0.017046   | 7.760332   | 2.785737   |
| <b>Ningxia</b>        | 0.001664   | 2.053189   | 1.432895   |
| <b>Xinjiang</b>       | 0.000907   | 18.915541  | 4.349200   |

**Table S13.** Sample learning and prediction accuracy comparison (four indicators forecasting VTH).

| <b>Region</b>  | <b>MPE</b> | <b>MSE</b> | <b>SDE</b> |
|----------------|------------|------------|------------|
| <b>China</b>   | 0.000811   | 0.010810   | 0.103971   |
| <b>Beijing</b> | 0.001013   | 0.000203   | 0.014242   |

|                |          |          |          |
|----------------|----------|----------|----------|
| Tianjin        | 0.000000 | 0.000000 | 0.000000 |
| Hebei          | 0.001254 | 0.000258 | 0.016048 |
| Shanxi         | 0.000000 | 0.000000 | 0.000002 |
| Inner Mongolia | 0.000003 | 0.000000 | 0.000031 |
| Liaoning       | 0.000623 | 0.000056 | 0.007515 |
| Jilin          | 0.000000 | 0.000000 | 0.000000 |
| Heilongjiang   | 0.000485 | 0.000020 | 0.004454 |
| Shanghai       | 0.000000 | 0.000000 | 0.000036 |
| Jiangsu        | 0.000639 | 0.000819 | 0.028615 |
| Zhejiang       | 0.004995 | 0.003639 | 0.060321 |
| Anhui          | 0.000000 | 0.000000 | 0.000000 |
| Fujian         | 0.000000 | 0.000000 | 0.000017 |
| Jiangxi        | 0.000563 | 0.000055 | 0.007400 |
| Shandong       | 0.000310 | 0.000332 | 0.018208 |
| Henan          | 0.000000 | 0.000000 | 0.000000 |
| Hubei          | 0.000000 | 0.000000 | 0.000000 |
| Hunan          | 0.000672 | 0.000058 | 0.007636 |
| Guangdong      | 0.000290 | 0.000888 | 0.029797 |
| Guangxi        | 0.000443 | 0.000037 | 0.006108 |
| Hainan         | 0.000000 | 0.000000 | 0.000000 |
| Chongqing      | 0.000970 | 0.000028 | 0.005302 |
| Sichuan        | 0.000379 | 0.000160 | 0.012652 |
| Guizhou        | 0.000000 | 0.000000 | 0.000000 |
| Yunnan         | 0.000001 | 0.000000 | 0.000132 |
| Shaanxi        | 0.000706 | 0.000044 | 0.006650 |
| Gansu          | 0.001845 | 0.000058 | 0.007648 |
| Qinghai        | 0.000000 | 0.000000 | 0.000000 |
| Ningxia        | 0.001917 | 0.000007 | 0.002560 |
| Xinjiang       | 0.000226 | 0.000011 | 0.003317 |

**Table S14.** Sample learning and prediction accuracy comparison (four indicators forecasting OWT (100 million)).

| Region         | MPE      | MSE      | SDE      |
|----------------|----------|----------|----------|
| China          | 0.000651 | 0.010340 | 0.101683 |
| Beijing        | 0.001128 | 0.000240 | 0.015485 |
| Tianjin        | 0.000000 | 0.000000 | 0.000000 |
| Hebei          | 0.001368 | 0.000220 | 0.014841 |
| Shanxi         | 0.000000 | 0.000000 | 0.000004 |
| Inner Mongolia | 0.000001 | 0.000000 | 0.000011 |
| Liaoning       | 0.000342 | 0.000018 | 0.004298 |
| Jilin          | 0.001028 | 0.000049 | 0.007010 |
| Heilongjiang   | 0.000213 | 0.000005 | 0.002254 |
| Shanghai       | 0.000000 | 0.000000 | 0.000003 |
| Jiangsu        | 0.000022 | 0.000019 | 0.004314 |
| Zhejiang       | 0.005363 | 0.003790 | 0.061564 |
| Anhui          | 0.000207 | 0.000008 | 0.002796 |
| Fujian         | 0.000000 | 0.000000 | 0.000008 |
| Jiangxi        | 0.000000 | 0.000000 | 0.000000 |
| Shandong       | 0.000242 | 0.000296 | 0.017211 |
| Henan          | 0.000000 | 0.000000 | 0.000000 |

|           |          |          |          |
|-----------|----------|----------|----------|
| Hubei     | 0.000000 | 0.000000 | 0.000000 |
| Hunan     | 0.000563 | 0.000057 | 0.007576 |
| Guangdong | 0.000280 | 0.000776 | 0.027856 |
| Guangxi   | 0.000295 | 0.000018 | 0.004296 |
| Hainan    | 0.000197 | 0.000001 | 0.001000 |
| Chongqing | 0.001036 | 0.000028 | 0.005333 |
| Sichuan   | 0.000414 | 0.000149 | 0.012222 |
| Guizhou   | 0.000000 | 0.000000 | 0.000000 |
| Yunnan    | 0.000000 | 0.000000 | 0.000015 |
| Shaanxi   | 0.000748 | 0.000037 | 0.006109 |
| Gansu     | 0.001971 | 0.000053 | 0.007294 |
| Qinghai   | 0.002579 | 0.000004 | 0.001918 |
| Ningxia   | 0.001461 | 0.000008 | 0.002795 |
| Xinjiang  | 0.000110 | 0.000004 | 0.001999 |

**Table S15.** Sample learning and prediction accuracy comparison (four indicators forecasting NOH: 10,000 people).

| Region         | MPE      | MSE        | SDE       |
|----------------|----------|------------|-----------|
| China          | 0.000002 | 0.066784   | 0.258426  |
| Beijing        | 0.000644 | 10.606083  | 3.256698  |
| Tianjin        | 0.004849 | 4.744277   | 2.178136  |
| Hebei          | 0.001584 | 190.051158 | 13.785904 |
| Shanxi         | 0.000215 | 9.629034   | 3.103069  |
| Inner Mongolia | 0.000001 | 0.001251   | 0.035367  |
| Liaoning       | 0.000000 | 0.000000   | 0.000585  |
| Jilin          | 0.001054 | 9.280906   | 3.046458  |
| Heilongjiang   | 0.000748 | 17.888213  | 4.229446  |
| Shanghai       | 0.000118 | 3.459122   | 1.859871  |
| Jiangsu        | 0.000402 | 21.905976  | 4.680382  |
| Zhejiang       | 0.000128 | 8.231969   | 2.869141  |
| Anhui          | 0.000517 | 29.993593  | 5.476641  |
| Fujian         | 0.002244 | 79.058099  | 8.891462  |
| Jiangxi        | 0.000000 | 0.000000   | 0.000111  |
| Shandong       | 0.000287 | 205.890915 | 14.348899 |
| Henan          | 0.000000 | 0.000030   | 0.005500  |
| Hubei          | 0.008690 | 255.397376 | 15.981157 |
| Hunan          | 0.001632 | 59.442125  | 7.709872  |
| Guangdong      | 0.001153 | 80.864327  | 8.992459  |
| Guangxi        | 0.000312 | 0.968018   | 0.983879  |
| Hainan         | 0.003177 | 1.927869   | 1.388477  |
| Chongqing      | 0.000000 | 0.000000   | 0.000210  |
| Sichuan        | 0.000348 | 173.464960 | 13.170610 |
| Guizhou        | 0.000000 | 0.000000   | 0.000264  |
| Yunnan         | 0.000694 | 44.667220  | 6.683354  |
| Shaanxi        | 0.000000 | 0.000452   | 0.021260  |
| Gansu          | 0.002734 | 24.762121  | 4.976155  |
| Qinghai        | 0.012505 | 6.635588   | 2.575964  |
| Ningxia        | 0.002133 | 1.081430   | 1.039918  |
| Xinjiang       | 0.003732 | 46.643747  | 6.829623  |
